# Supplementary material
Source: PubMed Central journal article supplement (PMC55815)
Supplement: nar_29_14_2905__1.pdf [file nar_29_14_2905__1.pdf]

## SUPPLEMENTARY MATERIAL

Table S1. Sequences of synthetic EREs, ER binding affinities and transcriptional activity in transfected cells

| name          | sequence                                                | ER $\alpha$ binding (K <sub>d</sub> in nM). | ER $\beta$ binding (Kd in nM) | E <sub>2</sub> activation-ER $\alpha$ (10nM unless otherwise indicated)              |
|---------------|---------------------------------------------------------|---------------------------------------------|-------------------------------|--------------------------------------------------------------------------------------|
| ERec38        | 5'-CCAGGTCAGAGTGACCTGAGCTAAAATAACACATTCAG-3' (17bp ERE) | 0.24 (39); 0.11 (108)                       | 0.15 (24)<br>0.64 (108)       | 2-fold in MCF-7 cells (94); 4-fold in CHO-K1 cells transfected with ER $\alpha$ (24) |
| ERec13        | 5'-CTGGTCACTCTGACCGG-3'                                 | 1.08 (108)                                  | 1.72 (108)                    | 1.85 in CHO-K1 cells transfected with ER $\alpha$ (108)                              |
| ERE15         | 5'-AGCTTCGAGGAGGTCACAGTGACCTGGAGCG-3'                   | 0.15-0.25 (56)<br>0.15 (100 mM KCl) (198)   |                               | 3.92-fold in CHO-K1 cells transfected with ER $\alpha$ (108)                         |
| ERec15        | 5'-TAGGTCAGAGTGACCTAG-3'                                | 0.11 (108)                                  | 0.13 (108)                    | 3.92-fold in CHO-K1 cells transfected with ER $\alpha$ (108)                         |
| ERec17        | 5'-CCAGGTCAGAGTGACCTGAG-3'                              | 0.18 (108)                                  | 0.25 (108)                    | 4.09-fold in CHO-K1 cells transfected with ER $\alpha$ (108)                         |
| ERec19        | 5'-CCAGGTCAGAGTGACCTGGAG-3'                             | 0.25 (108)                                  | 0.41 (108)                    | 4.66-fold in CHO-K1 cells transfected with ER $\alpha$ (108)                         |
| ERec17,4      | 5'-TCAGGTCAGAGTGACCTGAGCT-3'                            | 0.11 (108)                                  | 0.45 (108)                    | 3.12-in CHO-K1 cells transfected with ER $\alpha$ (108)                              |
| ERec17,6      | 5'-TCAGGTCAGAGTGACCTGAGCTAA-3'                          | 0.25 (108)                                  | 0.34 (108)                    | 3.99-fold in CHO-K1 cells transfected with ER $\alpha$ (108)                         |
| ERec17,11     | 5'-TCAGGTCAGAGTGACCTGAGCTAAAATAA-3'                     | 0.10 (108)                                  | 0.19 (108)                    | 4.89-fold in CHO-K1 cells transfected with ER $\alpha$ (108)                         |
| F-ERE         | 5'-AGCTTCGAGGAGGTCACAGTGACCTGGAGCGGATC-3'               | 8 at 200 mM KCl (109)                       |                               |                                                                                      |
| F-ERE-mut A   | 5'-AGCTTCGAGGTGGTCACAGTGACCAAGGAGCGGATC-3'              | 200 at 200 mM KCl (109)                     |                               |                                                                                      |
| F-ERE-mut B   | 5'-AGCTTCGAGGACGTCACAGTGACGTGGAGCGGATC-3'               | 336 at 200mM KCl (109)                      |                               |                                                                                      |
| F-ERE-mut C   | 5'-AGCTTCGAGGAGGTCACAGTGAGCTGGAGCGGATC-3'               | 288 at 200mM KCl (109)                      |                               |                                                                                      |
| F-ERE-mut D   | 5'-AGCTTCGAGGAGGACACAGTGTCTGGAGCGGATC-3'                | 272 at 200mM KCl (109)                      |                               |                                                                                      |
| F-ERE-mut E   | 5'-AGCTTCGAGGAGGTCACAGTACCTGGAGCGGATC-3'                | 648 at 200mM KCl (109)                      |                               |                                                                                      |
| F-ERE-mut E   | 5'-AGCTTCGAGGAGGTCACAGACCTGGAGCGGATC-3'                 | 248 at 200mM KCl (109)                      |                               |                                                                                      |
| EREmT         | 5'-AGCTTCGAGGAGGTCACAGTGATCTGGAGCG-3'                   | 390 (100 mM KCl) (198)                      |                               |                                                                                      |
| ERE''c''      | 5'-GGACACGATGTCC-3'                                     | No binding (199)                            |                               |                                                                                      |
| ERE mutant    | 5'-GGCCACAGTGAAC-3'                                     |                                             |                               | No activity (102)                                                                    |
| EREmut1       | 5'-GGACACTGTGACC-3'                                     |                                             |                               | 2.9-fold induction in MCF-7 cells (102)                                              |
| EREmut4       | 5'-GGACACTGTGTCC-3'                                     |                                             |                               | 4.3-fold induction in MCF-7 cells (102)                                              |
| EREmut3       | 5'-GGACACTGTGTAC-3'                                     |                                             |                               | 3.6-fold induction in MCF-7 cells (102)                                              |
| PS2 mutant M1 | 5'-GGTCACGGTTGCC-3' (imperfect 13 bp ERE)               |                                             |                               | 2-fold in HeLa cells transfected with HEO ER $\alpha$ (148);                         |
| PS2 mutant M1 | 5'-GGTCACGGTGGAG-3' (imperfect 13 bp ERE)               |                                             |                               | 1.2-fold in HeLa cells transfected with HEO ER $\alpha$ vector (148);                |
| VitERE mutant | 5'-GGTCACGGTGGCC-3' (imperfect 13 bp ERE)               |                                             |                               | No induction (200)                                                                   |

Table S1. Continued

|              |                                                  |                                   |                  |                                                                                                             |
|--------------|--------------------------------------------------|-----------------------------------|------------------|-------------------------------------------------------------------------------------------------------------|
| C3M1         | 5'-CAGGTGGCCCTTACTCTGGGAGAGT-3'                  |                                   |                  | 4-fold induction with ER $\alpha$ in HepG2 cells treated with 100 nM E <sub>2</sub> (163)                   |
| ERE mutant   | 5'-GATCACAGTGATC-3'                              | 185 (138)                         |                  |                                                                                                             |
| C3m2         | 5'-GGACACCCCTGGCC-3'                             |                                   |                  | 6-fold in HepG2 transfected with ER $\alpha$ (201)                                                          |
| mmERE        | 5'-TCAGATTTCAGAAATCTGA-3'                        | No binding (202)                  |                  |                                                                                                             |
| mutERE       | 5'-CCGTCACAGTGACCT-3'                            | No binding (203)                  |                  | Transcriptional activation in yeast is 20% of that for 15bp ERE palindrome (203)                            |
| 2bp spacer   | 5'-GGTCAAGTGATC-3'                               | No binding (49)                   |                  |                                                                                                             |
| overERE      | 5'-AGCTGCTCAGGTGACCTGACCTGACCTCTACT-3'           | Two ER $\alpha$ dimers bind (128) |                  | 4-fold higher transcriptional activity than a consensus ERE in HepG2 cells with 100 nM E <sub>2</sub> (128) |
| mt-fos-ERE   | 5'-TCGACCTTTATCCATTTACCACAGCCCAGGCCATG-3'        | ER $\alpha$ binds (145)           | No binding (145) |                                                                                                             |
| EREZ20       | 5'-CCAGGTCAGAGTGGCCTGAGCTAAAAAATACACATTCAG-3'    |                                   |                  |                                                                                                             |
| EREZ22       | 5'-CCAGGTCAGAGTAGCCTGAGCTAAAAAATACACATTCAG-3'    | 1.39 (39)                         |                  |                                                                                                             |
| EREZ23       | 5'-CCAGGTCAGAGTGTCTGAGCTAAAAAATACACATTCAG-3'     | 1.58 (39)                         |                  |                                                                                                             |
| EREZ25       | 5'-CCAGGTCAGAGAAATGACCTGAGCTAAAAAATACACATTCAG-3' | No binding (39)                   |                  |                                                                                                             |
| EREZ26       | 5'-CCAGGTCAGGTGACCTGAGCTAAAAAATACACATTCAG-3'     | 1.51 (39)                         |                  |                                                                                                             |
| EREZ27       | 5'-CCGGTCAGAGTGACCGAGCTAAAAAATACACATTCAG-3'      | 0.36 (39)                         |                  |                                                                                                             |
| EREm(-)      | 5'-CTGGTCACTCTGACC-3'                            | 0.81 (44)                         |                  |                                                                                                             |
| EREhs(-)     | 5'-CTGGTCACTCTGCCGGTCAGAGTGACCAGCTGGTCACTC-3'    | 1.65 (44)                         |                  |                                                                                                             |
| GCERec       | 5'-CCAGGTCAGAGTGACCTGAGCTGACAGGACTGACCAG-3'      | 0.28 (44)                         |                  |                                                                                                             |
| ERExx(+)     | 5'-CCAGGTCAGAGTGACCGACGTTAAAAAATAACAATTCAG-3'    | 1.56 (44)                         |                  |                                                                                                             |
| EREc(-)      | 5'-CCAGGTCAGAGTGACCTGAG-3'                       | 2.02 (45)                         |                  |                                                                                                             |
| EREp13       | 5'-CCC GCGAGATATGGT CAGAGTGACCGAGATTCCTA-3'      | 6.9 (21)                          |                  |                                                                                                             |
| EREp13d1     | 5'-CCC GCGAGATATGGG CAGAGTGACCGAGATTCCTA-3'      | No binding (21)                   |                  |                                                                                                             |
| EREp13g(-6)c | 5'-CCC GCGAGATATCGT CAGAGTGACCGAGATTCCTA-3'      | No binding (21)                   |                  |                                                                                                             |
| EREp13(-5)c  | 5'-CCC GCGAGATATGCT CAGAGTGACCGAGATTCCTA-3'      | No binding (21)                   |                  |                                                                                                             |
| EREp13(-3)g  | 5'-CCC GCGAGATATGGT GAGAGTGACCGAGATTCCTA-3'      | No binding (21)                   |                  |                                                                                                             |
| EREp13(-2)t  | 5'-CCC GCGAGATATGGT CTGAGTGACCGAGATTCCTA-3'      | No binding (21)                   |                  |                                                                                                             |
| EREp13d1+A   | 5'-CCC GCGAGATATAGGG CAGAGTGACCGAGATTCCTA-3'     | Binding, but Kd ND (21)           |                  |                                                                                                             |
| EREp13d1+A   | 5'-CCC GCGAGATATGGG CAGAGTGACCGAGATTCCTA-3'      | Binding, but Kd ND (21)           |                  |                                                                                                             |
| EREp15       | 5'-CCC GCGAGATATAGGT CAGAGTGACCTGAGATTCCTA-3'    | 0.54 (21)                         |                  |                                                                                                             |
| EREp15d2     | 5'-CCC GCGAGATATAGGG CTGAGTGACCTGAGATTCCTA-3'    | 20 (21)                           |                  |                                                                                                             |
| EREp17       | 5'-CCC GCGAGATACAGGT CAGAGTGACCTGAGATTCCTA-3'    | 0.25 (21)                         |                  |                                                                                                             |
| EREc17d2     | 5'-CCC GCGAGATACAGGG CTGAGTGACCTGAGATTCCTA-3'    | 20 (21)                           |                  |                                                                                                             |
| CAR oxytocin | 5'-GGTGACCTTGAAC-3'                              |                                   |                  | 4-fold in P19 EC transfected with ER $\alpha$ cells and treated with 100 nM E <sub>2</sub> (204)            |
| GTR oxytocin | 5'-GGTGGCCTTGACC-3'                              |                                   |                  | 6-fold in P19 EC transfected with ER $\alpha$ cells and treated with 100 nM E <sub>2</sub> (204)            |

The underlined nucleotides constitute the consensus ERE half-site IR sequence and nucleotides in bold type are altered from the consensus.
